# Supplementary material for: Corona protein composition and cytotoxicity evaluation of ultra-small zeolites synthesized from template free precursor suspensions
Source: Royal Society of Chemistry journal article supplement (doi:10.1039/c3tx50023c), 2013-01-01
Supplement: c3tx50023c.pdf [file c3tx50023c.pdf]

## Supporting Information

### Corona protein composition and cytotoxicity evaluation of ultra-small zeolites synthesized from template free precursor suspensions

S. Laurent<sup>1</sup>•, E.-P. Ng<sup>2</sup>•, C. Thirifays<sup>1</sup>, L. Lakiss<sup>3</sup>, G.-M. Goupil<sup>3</sup>, S. Mintova<sup>3\*</sup>, C. Burtea<sup>1</sup>, E. Oveisi<sup>4,5</sup>, C. Hébert<sup>4,5</sup>, M. de Vries<sup>6</sup>, M. Motazacker<sup>7</sup>, F. Rezaee<sup>#6\*</sup>, and M. Mahmoudi<sup>#,8,9\*</sup>

<sup>1</sup>Department of General, Organic, and Biomedical Chemistry, NMR and Molecular Imaging Laboratory, University of Mons, Avenue Maistriau, 19, B-7000 Mons, Belgium

<sup>2</sup>School of Chemical Sciences, University Sains Malaysia, 11800 USM, Penang, Malaysia.

<sup>3</sup>Laboratory of Catalysis and Spectroscopy, ENSICAEN, University of Caen, CNRS, 6 Boulevard du Maréchal Juin, 14050 Caen, France

<sup>4</sup>Interdisciplinary Centre for Electron Microscopy, École Polytechnique Fédérale de Lausanne (EPFL), CH-1015 Lausanne, Switzerland

<sup>5</sup>Electron Spectrometry and Microscopy Laboratory, École Polytechnique Fédérale de Lausanne (EPFL), CH-1015 Lausanne, Switzerland

<sup>6</sup>Department of Cell Biology, University Medical Center Groningen, University of Groningen, Groningen, The Netherlands

<sup>7</sup>Department of Experimental Vascular Medicine, Academic Medical Center, Amsterdam, The Netherlands

<sup>8</sup>Department of Nanotechnology, Faculty of Pharmacy, Tehran University of Medical Sciences, Tehran, Iran

<sup>9</sup>Nanotechnology Research Center, Faculty of Pharmacy, Tehran University of Medical Sciences, Tehran, Iran

• These authors contributed equally to this work as first author.

#These authors contributed equally to this work as last author.\*Corresponding Authors: [mintova@ensicaen.fr](mailto:mintova@ensicaen.fr) (S.M.); [f.rezaee@med.umcg.nl](mailto:f.rezaee@med.umcg.nl) (F.R.); [Mahmoudi@illinois.edu](mailto:Mahmoudi@illinois.edu) (M.M.)

**Table S1:** The accession number, gene name, species (Human), identification score (-10lgP), molecular weight (Mw) in kDa, protein description, total spectra per protein of LTL zeolite particles incubated with 10% human plasma, together with their relative amount (NpSpCkt value).

| Accession          | -10lgP | Mw (D)   | Description                                                    | NpSpCk  |         |         |         | Spectra |         |         |         | Total Spectra | Average NpSpCk |
|--------------------|--------|----------|----------------------------------------------------------------|---------|---------|---------|---------|---------|---------|---------|---------|---------------|----------------|
|                    |        |          |                                                                | Sample1 | Sample2 | Sample3 | Sample4 | Sample1 | Sample2 | Sample3 | Sample4 |               |                |
| P01834 IGKC_HUMAN  | 196.84 | 11608.85 | Ig kappa chain C region OS=Homo sapiens GN=IGKC PE=1 SV=1      | 6.034   | 4.512   | 5.652   | 13.914  | 6       | 4       | 5       | 5       | 20            | 7.528          |
| P02679 FIBG_HUMAN  | 299.49 | 51511.68 | Fibrinogen gamma chain OS=Homo sapiens GN=FGG PE=1 SV=3        | 4.080   | 3.813   | 4.331   | 6.898   | 18      | 15      | 17      | 11      | 61            | 4.781          |
| P02671 FIBA_HUMAN  | 387.69 | 94973.1  | Fibrinogen alpha chain OS=Homo sapiens GN=FGA PE=1 SV=2        | 4.303   | 5.101   | 4.698   | 3.742   | 35      | 37      | 34      | 11      | 117           | 4.461          |
| P02647 APOA1_HUMAN | 237.89 | 30777.82 | Apolipoprotein A-I OS=Homo sapiens GN=APOA1 PE=1 SV=1          | 4.931   | 5.956   | 5.116   | 1.050   | 13      | 14      | 12      | 1       | 40            | 4.263          |
| P01857 IGHG1_HUMAN | 239.11 | 36105.91 | Ig gamma-1 chain C region OS=Homo sapiens GN=IGHG1 PE=1 SV=1   | 3.880   | 3.989   | 3.998   | 3.579   | 12      | 11      | 11      | 4       | 38            | 3.862          |
| P02768 ALBU_HUMAN  | 283.01 | 69366.8  | Serum albumin OS=Homo sapiens GN=ALB PE=1 SV=2                 | 4.208   | 3.209   | 4.162   | 3.726   | 25      | 17      | 22      | 8       | 72            | 3.826          |
| P0CG05 LAC2_HUMAN  | 149.33 | 11293.56 | Ig lambda-2 chain C regions OS=Homo sapiens GN=IGLC2 PE=1 SV=1 | 2.068   | 4.638   | 4.648   | 2.860   | 2       | 4       | 4       | 1       | 11            | 3.553          |
| P02652 APOA2_HUMAN | 115.32 | 11175.02 | Apolipoprotein A-II OS=Homo sapiens GN=APOA2 PE=1 SV=1         | 4.179   | 4.687   | 4.697   | 0.000   | 4       | 4       | 4       | 0       | 12            | 3.391          |
| P02675 FIBB_HUMAN  | 249.19 | 55928.21 | Fibrinogen beta chain OS=Homo sapiens GN=FGB PE=1 SV=2         | 2.923   | 3.044   | 3.285   | 2.310   | 14      | 13      | 14      | 4       | 45            | 2.890          |
| P01623 KV305_HUMAN | 177.59 | 11746.11 | Ig kappa chain V-III region WOL OS=Homo sapiens PE=1 SV=1      | 3.976   | 3.344   | 3.352   | 0.000   | 4       | 3       | 3       | 0       | 10            | 2.668          |
| P01620 KV302_HUMAN | 177.59 | 11775.06 | Ig kappa chain V-III region SIE OS=Homo sapiens PE=1 SV=1      | 3.966   | 3.336   | 3.343   | 0.000   | 4       | 3       | 3       | 0       | 10            | 2.661          |
| P01024 CO3_HUMAN   | 407.55 | 187146.9 | Complement C3 OS=Homo sapiens GN=C3 PE=1 SV=2                  | 2.433   | 2.309   | 1.893   | 2.762   | 39      | 33      | 27      | 16      | 115           | 2.349          |
| P01598 KV106_HUMAN | 71.45  | 11788.23 | Ig kappa chain V-I region EU OS=Homo sapiens PE=1 SV=1         | 1.981   | 2.222   | 2.226   | 2.740   | 2       | 2       | 2       | 1       | 7             | 2.292          |
| P04208 LV106_HUMAN | 105.35 | 11724.96 | Ig lambda chain V-I region WAH OS=Homo sapiens PE=1 SV=1       | 2.987   | 3.350   | 2.238   | 0.000   | 3       | 3       | 2       | 0       | 8             | 2.144          |
| P01871 IGHM_HUMAN  | 171.05 | 49306.63 | Ig mu chain C region OS=Homo sapiens GN=IGHM PE=1 SV=3         | 1.658   | 1.593   | 2.129   | 2.621   | 7       | 6       | 8       | 4       | 25            | 2.000          |
| P80748 LV302_HUMAN | 86.55  | 11935.15 | Ig lambda chain V-III region LOI OS=Homo sapiens PE=1 SV=1     | 2.935   | 2.194   | 0.000   | 2.707   | 3       | 2       | 0       | 1       | 6             | 1.959          |
| P01860 IGHG3_HUMAN | 162.25 | 41286.99 | Ig gamma-3 chain C region OS=Homo sapiens GN=IGHG3 PE=1 SV=2   | 1.980   | 2.220   | 2.225   | 0.000   | 7       | 7       | 7       | 0       | 21            | 1.606          |
| P02649 APOE_HUMAN  | 227.41 | 36154.09 | Apolipoprotein E OS=Homo sapiens GN=APOE PE=1 SV=1             | 1.615   | 2.173   | 2.541   | 0.000   | 5       | 6       | 7       | 0       | 18            | 1.582          |

|                    |        |          |                                                                             |       |       |       |       |   |   |   |   |    |       |
|--------------------|--------|----------|-----------------------------------------------------------------------------|-------|-------|-------|-------|---|---|---|---|----|-------|
| P01600 KV108_HUMAN | 119.06 | 11670.97 | Ig kappa chain V-I region Hau OS=Homo sapiens PE=1 SV=1                     | 1.000 | 1.122 | 1.124 | 2.768 | 1 | 1 | 1 | 1 | 4  | 1.504 |
| P80362 KV125_HUMAN | 119.06 | 11737.07 | Ig kappa chain V-I region WAT OS=Homo sapiens PE=1 SV=1                     | 0.995 | 1.116 | 1.118 | 2.752 | 1 | 1 | 1 | 1 | 4  | 1.495 |
| P01609 KV117_HUMAN | 119.06 | 11764.01 | Ig kappa chain V-I region Scw OS=Homo sapiens PE=1 SV=1                     | 0.992 | 1.113 | 1.116 | 2.746 | 1 | 1 | 1 | 1 | 4  | 1.492 |
| P01608 KV116_HUMAN | 119.06 | 11782.19 | Ig kappa chain V-I region Roy OS=Homo sapiens PE=1 SV=1                     | 0.991 | 1.111 | 1.114 | 2.742 | 1 | 1 | 1 | 1 | 4  | 1.489 |
| P01599 KV107_HUMAN | 119.06 | 11814.2  | Ig kappa chain V-I region Gal OS=Homo sapiens PE=1 SV=1                     | 0.988 | 1.108 | 1.111 | 2.734 | 1 | 1 | 1 | 1 | 4  | 1.485 |
| P01610 KV118_HUMAN | 119.06 | 11840.2  | Ig kappa chain V-I region WEA OS=Homo sapiens PE=1 SV=1                     | 0.986 | 1.106 | 1.108 | 2.728 | 1 | 1 | 1 | 1 | 4  | 1.482 |
| P01607 KV115_HUMAN | 119.06 | 11902.26 | Ig kappa chain V-I region Rei OS=Homo sapiens PE=1 SV=1                     | 0.981 | 1.100 | 1.103 | 2.714 | 1 | 1 | 1 | 1 | 4  | 1.474 |
| P01594 KV102_HUMAN | 119.06 | 11939.24 | Ig kappa chain V-I region AU OS=Homo sapiens PE=1 SV=1                      | 0.978 | 1.097 | 1.099 | 2.706 | 1 | 1 | 1 | 1 | 4  | 1.470 |
| P01593 KV101_HUMAN | 119.06 | 11992.34 | Ig kappa chain V-I region AG OS=Homo sapiens PE=1 SV=1                      | 0.974 | 1.092 | 1.094 | 2.694 | 1 | 1 | 1 | 1 | 4  | 1.463 |
| P01766 HV305_HUMAN | 85.54  | 13226.74 | Ig heavy chain V-III region BRO OS=Homo sapiens PE=1 SV=1                   | 0.883 | 0.990 | 0.992 | 2.442 | 1 | 1 | 1 | 1 | 4  | 1.327 |
| P01859 IGHG2_HUMAN | 125.21 | 35900.65 | Ig gamma-2 chain C region OS=Homo sapiens GN=IGHG2 PE=1 SV=2                | 1.626 | 1.824 | 1.828 | 0.000 | 5 | 5 | 5 | 0 | 15 | 1.319 |
| P01700 LV102_HUMAN | 85.38  | 11896.17 | Ig lambda chain V-I region HA OS=Homo sapiens PE=1 SV=1                     | 1.963 | 2.201 | 1.103 | 0.000 | 2 | 2 | 1 | 0 | 5  | 1.317 |
| B9A064 IGLL5_HUMAN | 128.78 | 23063.24 | Immunoglobulin lambda-like polypeptide 5 OS=Homo sapiens GN=IGLL5 PE=2 SV=2 | 1.012 | 1.136 | 1.707 | 1.401 | 2 | 2 | 3 | 1 | 8  | 1.314 |
| A0M8Q6 LAC7_HUMAN  | 124.95 | 11302.66 | Ig lambda-7 chain C region OS=Homo sapiens GN=IGLC7 PE=1 SV=2               | 0.000 | 0.000 | 2.322 | 2.858 | 0 | 0 | 2 | 1 | 3  | 1.295 |
| P0CG06 LAC3_HUMAN  | 149.33 | 11237.5  | Ig lambda-3 chain C regions OS=Homo sapiens GN=IGLC3 PE=1 SV=1              | 2.078 | 0.000 | 0.000 | 2.875 | 2 | 0 | 0 | 1 | 3  | 1.238 |
| P01876 IGHA1_HUMAN | 148.03 | 37654.66 | Ig alpha-1 chain C region OS=Homo sapiens GN=IGHA1 PE=1 SV=2                | 1.550 | 1.739 | 1.394 | 0.000 | 5 | 5 | 4 | 0 | 14 | 1.171 |
| P02746 C1QB_HUMAN  | 73.96  | 26721.75 | Complement C1q subcomponent subunit B OS=Homo sapiens GN=C1QB PE=1 SV=3     | 0.000 | 0.980 | 0.982 | 2.418 | 0 | 2 | 2 | 2 | 6  | 1.095 |
| P06727 APOA4_HUMAN | 130.17 | 45399.07 | Apolipoprotein A-IV OS=Homo sapiens GN=APOA4 PE=1 SV=3                      | 1.800 | 0.577 | 0.867 | 0.712 | 7 | 2 | 3 | 1 | 13 | 0.989 |
| P04004 VTNC_HUMAN  | 182.35 | 54305.59 | Vitronectin OS=Homo sapiens GN=VTN PE=1 SV=1                                | 1.075 | 0.964 | 1.208 | 0.595 | 5 | 4 | 5 | 1 | 15 | 0.961 |
| P00751 CFAB_HUMAN  | 198.24 | 85532.94 | Complement factor B OS=Homo sapiens GN=CFB PE=1 SV=2                        | 0.956 | 1.225 | 1.074 | 0.378 | 7 | 8 | 7 | 1 | 23 | 0.908 |
| P06310 KV206_HUMAN | 99.86  | 14706.7  | Ig kappa chain V-II region RPMI 6410 OS=Homo sapiens PE=4 SV=1              | 0.794 | 1.781 | 0.892 | 0.000 | 1 | 2 | 1 | 0 | 4  | 0.867 |
| P06396 GELS_HUMAN  | 118.08 | 85697.48 | Gelsolin OS=Homo sapiens GN=GSN PE=1 SV=1                                   | 0.545 | 0.917 | 0.459 | 1.131 | 4 | 6 | 3 | 3 | 16 | 0.763 |
| P06309 KV205_HUMAN | 99.86  | 12664.16 | Ig kappa chain V-II region GM607                                            | 0.922 | 1.034 | 1.036 | 0.000 | 1 | 1 | 1 | 0 | 3  | 0.748 |

|                    |        |          |                                                                                 |       |       |       |       |    |    |    |   |    |       |
|--------------------|--------|----------|---------------------------------------------------------------------------------|-------|-------|-------|-------|----|----|----|---|----|-------|
|                    |        |          | (Fragment) OS=Homo sapiens PE=4 SV=1                                            |       |       |       |       |    |    |    |   |    |       |
| P01614 KV201_HUMAN | 99.86  | 12676.25 | Ig kappa chain V-II region Cum OS=Homo sapiens PE=1 SV=1                        | 0.921 | 1.033 | 1.035 | 0.000 | 1  | 1  | 1  | 0 | 3  | 0.747 |
| P0CF74 LAC6_HUMAN  | 124.95 | 11276.54 | Ig lambda-6 chain C region OS=Homo sapiens GN=IGLC6 PE=4 SV=1                   | 0.000 | 0.000 | 0.000 | 2.865 | 0  | 0  | 0  | 1 | 1  | 0.716 |
| P0CG04 LAC1_HUMAN  | 98.05  | 11347.66 | Ig lambda-1 chain C regions OS=Homo sapiens GN=IGLC1 PE=1 SV=1                  | 0.000 | 0.000 | 0.000 | 2.847 | 0  | 0  | 0  | 1 | 1  | 0.712 |
| P01611 KV119_HUMAN | 74.55  | 11607.91 | Ig kappa chain V-I region Wes OS=Homo sapiens PE=1 SV=1                         | 0.000 | 0.000 | 0.000 | 2.783 | 0  | 0  | 0  | 1 | 1  | 0.696 |
| P04003 C4BPA_HUMAN | 130.15 | 67033.3  | C4b-binding protein alpha chain OS=Homo sapiens GN=C4BPA PE=1 SV=2              | 0.871 | 0.781 | 0.979 | 0.000 | 5  | 4  | 5  | 0 | 14 | 0.658 |
| P0C0L5 CO4B_HUMAN  | 207.03 | 192792.2 | Complement C4-B OS=Homo sapiens GN=C4B PE=1 SV=1                                | 0.727 | 0.611 | 0.545 | 0.503 | 12 | 9  | 8  | 3 | 32 | 0.596 |
| P08603 CFAH_HUMAN  | 188.42 | 139096.3 | Complement factor H OS=Homo sapiens GN=CFH PE=1 SV=4                            | 0.588 | 0.659 | 0.849 | 0.000 | 7  | 7  | 9  | 0 | 23 | 0.524 |
| P00747 PLMN_HUMAN  | 77.59  | 90569.05 | Plasminogen OS=Homo sapiens GN=PLG PE=1 SV=2                                    | 0.387 | 0.723 | 0.580 | 0.357 | 3  | 5  | 4  | 1 | 13 | 0.511 |
| P04433 KV309_HUMAN | 39.58  | 12575.17 | Ig kappa chain V-III region VG (Fragment) OS=Homo sapiens PE=1 SV=1             | 0.928 | 1.041 | 0.000 | 0.000 | 1  | 1  | 0  | 0 | 2  | 0.492 |
| P0C0L4 CO4A_HUMAN  | 207.03 | 192770.2 | Complement C4-A OS=Homo sapiens GN=C4A PE=1 SV=1                                | 0.727 | 0.611 | 0.545 | 0.000 | 12 | 9  | 8  | 0 | 29 | 0.471 |
| P02766 TTHY_HUMAN  | 59.02  | 15887.02 | Transthyretin OS=Homo sapiens GN=TTR PE=1 SV=1                                  | 0.000 | 0.824 | 0.826 | 0.000 | 0  | 1  | 1  | 0 | 2  | 0.413 |
| P01591 IGJ_HUMAN   | 53.46  | 18098.58 | Immunoglobulin J chain OS=Homo sapiens GN=IGJ PE=1 SV=4                         | 0.000 | 0.723 | 0.725 | 0.000 | 0  | 1  | 1  | 0 | 2  | 0.362 |
| P04114 APOB_HUMAN  | 270.42 | 515610.8 | Apolipoprotein B-100 OS=Homo sapiens GN=APOB PE=1 SV=2                          | 0.430 | 0.279 | 0.255 | 0.439 | 19 | 11 | 10 | 7 | 47 | 0.351 |
| P10909 CLUS_HUMAN  | 78.74  | 52494.64 | Clusterin OS=Homo sapiens GN=CLU PE=1 SV=1                                      | 0.000 | 0.000 | 0.750 | 0.615 | 0  | 0  | 3  | 1 | 4  | 0.341 |
| P02654 APOC1_HUMAN | 37.4   | 9331.92  | Apolipoprotein C-I OS=Homo sapiens GN=APOC1 PE=1 SV=1                           | 1.251 | 0.000 | 0.000 | 0.000 | 1  | 0  | 0  | 0 | 1  | 0.313 |
| P19827 ITIH1_HUMAN | 133.93 | 101389.1 | Inter-alpha-trypsin inhibitor heavy chain H1 OS=Homo sapiens GN=ITIH1 PE=1 SV=3 | 0.345 | 0.000 | 0.259 | 0.637 | 3  | 0  | 2  | 2 | 7  | 0.310 |
| P01709 LV206_HUMAN | 38.46  | 11557.57 | Ig lambda chain V-II region MGC OS=Homo sapiens PE=1 SV=1                       | 0.000 | 0.000 | 1.135 | 0.000 | 0  | 0  | 1  | 0 | 1  | 0.284 |
| P01707 LV204_HUMAN | 38.46  | 11560.83 | Ig lambda chain V-II region TRO OS=Homo sapiens PE=1 SV=1                       | 0.000 | 0.000 | 1.135 | 0.000 | 0  | 0  | 1  | 0 | 1  | 0.284 |
| P01712 LV209_HUMAN | 38.46  | 11693.92 | Ig lambda chain V-II region WIN OS=Homo sapiens PE=1 SV=1                       | 0.000 | 0.000 | 1.122 | 0.000 | 0  | 0  | 1  | 0 | 1  | 0.281 |
| P04196 HRG_HUMAN   | 48.64  | 59578.32 | Histidine-rich glycoprotein OS=Homo sapiens GN=HRG PE=1 SV=1                    | 0.392 | 0.440 | 0.220 | 0.000 | 2  | 2  | 1  | 0 | 5  | 0.263 |
| P01625 KV402_HUMAN | 93.02  | 12640.07 | Ig kappa chain V-IV region Len OS=Homo sapiens PE=1 SV=2                        | 0.000 | 1.036 | 0.000 | 0.000 | 0  | 1  | 0  | 0 | 1  | 0.259 |

|                    |        |          |                                                                                                            |       |       |       |       |   |   |   |   |    |       |
|--------------------|--------|----------|------------------------------------------------------------------------------------------------------------|-------|-------|-------|-------|---|---|---|---|----|-------|
| P01715 LV401_HUMAN | 32.19  | 11305.55 | Ig lambda chain V-IV region Bau OS=Homo sapiens PE=1 SV=1                                                  | 1.033 | 0.000 | 0.000 | 0.000 | 1 | 0 | 0 | 0 | 1  | 0.258 |
| P02749 APOH_HUMAN  | 66.52  | 38298.18 | Beta-2-glycoprotein 1 OS=Homo sapiens GN=APOH PE=1 SV=3                                                    | 0.305 | 0.342 | 0.343 | 0.000 | 1 | 1 | 1 | 0 | 3  | 0.247 |
| P01605 KV113_HUMAN | 50.62  | 11834.15 | Ig kappa chain V-I region Lay OS=Homo sapiens PE=1 SV=1                                                    | 0.987 | 0.000 | 0.000 | 0.000 | 1 | 0 | 0 | 0 | 1  | 0.247 |
| P02748 CO9_HUMAN   | 94.04  | 63173.49 | Complement component C9 OS=Homo sapiens GN=C9 PE=1 SV=2                                                    | 0.554 | 0.207 | 0.208 | 0.000 | 3 | 1 | 1 | 0 | 5  | 0.242 |
| P02787 TRFE_HUMAN  | 80.6   | 77063.97 | Serotransferrin OS=Homo sapiens GN=TF PE=1 SV=3                                                            | 0.455 | 0.000 | 0.511 | 0.000 | 3 | 0 | 3 | 0 | 6  | 0.241 |
| P04434 KV310_HUMAN | 50.62  | 12757.46 | Ig kappa chain V-III region VH (Fragment) OS=Homo sapiens PE=4 SV=1                                        | 0.915 | 0.000 | 0.000 | 0.000 | 1 | 0 | 0 | 0 | 1  | 0.229 |
| P23083 HV103_HUMAN | 60.93  | 13008.71 | Ig heavy chain V-I region V35 OS=Homo sapiens PE=1 SV=1                                                    | 0.898 | 0.000 | 0.000 | 0.000 | 1 | 0 | 0 | 0 | 1  | 0.224 |
| P09871 C1S_HUMAN   | 120.33 | 76684.54 | Complement C1s subcomponent OS=Homo sapiens GN=C1S PE=1 SV=1                                               | 0.305 | 0.000 | 0.513 | 0.000 | 2 | 0 | 3 | 0 | 5  | 0.204 |
| P04207 KV308_HUMAN | 50.62  | 14275.17 | Ig kappa chain V-III region CLL OS=Homo sapiens PE=1 SV=2                                                  | 0.818 | 0.000 | 0.000 | 0.000 | 1 | 0 | 0 | 0 | 1  | 0.204 |
| P01042 KNG1_HUMAN  | 41.23  | 71957.42 | Kininogen-1 OS=Homo sapiens GN=KNG1 PE=1 SV=2                                                              | 0.000 | 0.364 | 0.000 | 0.449 | 0 | 2 | 0 | 1 | 3  | 0.203 |
| P02751 FINC_HUMAN  | 121.41 | 262622   | Fibronectin OS=Homo sapiens GN=FN1 PE=1 SV=4                                                               | 0.267 | 0.150 | 0.250 | 0.123 | 6 | 3 | 5 | 1 | 15 | 0.197 |
| P01008 ANT3_HUMAN  | 81.11  | 52602.49 | Antithrombin-III OS=Homo sapiens GN=SERPINC1 PE=1 SV=1                                                     | 0.666 | 0.000 | 0.000 | 0.000 | 3 | 0 | 0 | 0 | 3  | 0.166 |
| O60682 MUSC_HUMAN  | 31.29  | 22067.64 | Musculin OS=Homo sapiens GN=MSC PE=1 SV=2                                                                  | 0.000 | 0.593 | 0.000 | 0.000 | 0 | 1 | 0 | 0 | 1  | 0.148 |
| P35858 ALS_HUMAN   | 52.14  | 66035.11 | Insulin-like growth factor-binding protein complex acid labile subunit OS=Homo sapiens GN=IGFALS PE=1 SV=1 | 0.177 | 0.198 | 0.199 | 0.000 | 1 | 1 | 1 | 0 | 3  | 0.143 |
| P19823 ITIH2_HUMAN | 62.52  | 106463.4 | Inter-alpha-trypsin inhibitor heavy chain H2 OS=Homo sapiens GN=ITIH2 PE=1 SV=2                            | 0.219 | 0.246 | 0.000 | 0.000 | 2 | 2 | 0 | 0 | 4  | 0.116 |
| P07357 CO8A_HUMAN  | 38.86  | 65163.25 | Complement component C8 alpha chain OS=Homo sapiens GN=C8A PE=1 SV=2                                       | 0.000 | 0.201 | 0.201 | 0.000 | 0 | 1 | 1 | 0 | 2  | 0.101 |
| O75636 FCN3_HUMAN  | 51.36  | 32902.97 | Ficolin-3 OS=Homo sapiens GN=FCN3 PE=1 SV=2                                                                | 0.000 | 0.398 | 0.000 | 0.000 | 0 | 1 | 0 | 0 | 1  | 0.099 |
| P00739 HPTR_HUMAN  | 43.51  | 39029.59 | Haptoglobin-related protein OS=Homo sapiens GN=HPR PE=1 SV=2                                               | 0.000 | 0.335 | 0.000 | 0.000 | 0 | 1 | 0 | 0 | 1  | 0.084 |
| P30460 1B08_HUMAN  | 29.85  | 40330.92 | HLA class I histocompatibility antigen, B-8 alpha chain OS=Homo sapiens GN=HLA-B PE=1 SV=1                 | 0.000 | 0.325 | 0.000 | 0.000 | 0 | 1 | 0 | 0 | 1  | 0.081 |
| P30479 1B41_HUMAN  | 29.85  | 40539.21 | HLA class I histocompatibility antigen, B-41 alpha chain OS=Homo sapiens GN=HLA-B PE=1 SV=1                | 0.000 | 0.323 | 0.000 | 0.000 | 0 | 1 | 0 | 0 | 1  | 0.081 |

|                    |        |          |                                                                                      |       |       |       |       |   |   |   |   |   |       |
|--------------------|--------|----------|--------------------------------------------------------------------------------------|-------|-------|-------|-------|---|---|---|---|---|-------|
| P23142 FBLN1_HUMAN | 63.21  | 77214.17 | Fibulin-1 OS=Homo sapiens GN=FBLN1 PE=1 SV=4                                         | 0.302 | 0.000 | 0.000 | 0.000 | 2 | 0 | 0 | 0 | 2 | 0.076 |
| P00738 HPT_HUMAN   | 35.67  | 45205.34 | Haptoglobin OS=Homo sapiens GN=HP PE=1 SV=1                                          | 0.000 | 0.000 | 0.290 | 0.000 | 0 | 0 | 1 | 0 | 1 | 0.073 |
| P05156 CFAI_HUMAN  | 48.34  | 65750.36 | Complement factor I OS=Homo sapiens GN=CFI PE=1 SV=2                                 | 0.000 | 0.199 | 0.000 | 0.000 | 0 | 1 | 0 | 0 | 1 | 0.050 |
| P01023 A2MG_HUMAN  | 32.38  | 163290.2 | Alpha-2-macroglobulin OS=Homo sapiens GN=A2M PE=1 SV=3                               | 0.000 | 0.080 | 0.080 | 0.000 | 0 | 1 | 1 | 0 | 2 | 0.040 |
| P01031 CO5_HUMAN   | 42.3   | 188304.2 | Complement C5 OS=Homo sapiens GN=C5 PE=1 SV=4                                        | 0.000 | 0.139 | 0.000 | 0.000 | 0 | 2 | 0 | 0 | 2 | 0.035 |
| Q08AE8 SPIR1_HUMAN | 35.7   | 85553.76 | Protein spire homolog 1 OS=Homo sapiens GN=SPIRE1 PE=1 SV=2                          | 0.136 | 0.000 | 0.000 | 0.000 | 1 | 0 | 0 | 0 | 1 | 0.034 |
| Q14624 ITIH4_HUMAN | 42.4   | 103357.4 | Inter-alpha-trypsin inhibitor heavy chain H4 OS=Homo sapiens GN=ITIH4 PE=1 SV=4      | 0.113 | 0.000 | 0.000 | 0.000 | 1 | 0 | 0 | 0 | 1 | 0.028 |
| Q86UR5 RIMS1_HUMAN | 29.97  | 189071.3 | Regulating synaptic membrane exocytosis protein 1 OS=Homo sapiens GN=RIMS1 PE=1 SV=1 | 0.000 | 0.069 | 0.000 | 0.000 | 0 | 1 | 0 | 0 | 1 | 0.017 |
| Q8IWN7 RP1L1_HUMAN | 32.56  | 261203   | Retinitis pigmentosa 1-like 1 protein OS=Homo sapiens GN=RP1L1 PE=1 SV=4             | 0.045 | 0.000 | 0.000 | 0.000 | 1 | 0 | 0 | 0 | 1 | 0.011 |
| P01774 HV313_HUMAN | 91.64  | 2012710  | Ig heavy chain V-III region POM OS=Homo sapiens PE=1 SV=1                            | 0.000 | 0.013 | 0.013 | 0.016 | 0 | 2 | 2 | 1 | 5 | 0.011 |
| P01779 HV318_HUMAN | 91.64  | 2012188  | Ig heavy chain V-III region TUR OS=Homo sapiens PE=1 SV=1                            | 0.000 | 0.007 | 0.013 | 0.016 | 0 | 1 | 2 | 1 | 4 | 0.009 |
| P01776 HV315_HUMAN | 91.64  | 2012847  | Ig heavy chain V-III region WAS OS=Homo sapiens PE=1 SV=1                            | 0.000 | 0.007 | 0.013 | 0.016 | 0 | 1 | 2 | 1 | 4 | 0.009 |
| P01777 HV316_HUMAN | 85.54  | 2012559  | Ig heavy chain V-III region TEI OS=Homo sapiens PE=1 SV=1                            | 0.006 | 0.007 | 0.007 | 0.016 | 1 | 1 | 1 | 1 | 4 | 0.009 |
| P01617 KV204_HUMAN | 99.86  | 2012059  | Ig kappa chain V-II region TEW OS=Homo sapiens PE=1 SV=1                             | 0.006 | 0.007 | 0.007 | 0.000 | 1 | 1 | 1 | 0 | 3 | 0.005 |
| P01765 HV304_HUMAN | 91.64  | 6011611  | Ig heavy chain V-III region TIL OS=Homo sapiens PE=1 SV=1                            | 0.000 | 0.002 | 0.004 | 0.005 | 0 | 1 | 2 | 1 | 4 | 0.003 |
| P01596 KV104_HUMAN | 107.19 | 3011346  | Ig kappa chain V-I region CAR OS=Homo sapiens PE=1 SV=1                              | 0.000 | 0.000 | 0.000 | 0.011 | 0 | 0 | 0 | 1 | 1 | 0.003 |
| P01781 HV320_HUMAN | 88.57  | 8011764  | Ig heavy chain V-III region GAL OS=Homo sapiens PE=1 SV=1                            | 0.003 | 0.003 | 0.002 | 0.000 | 2 | 2 | 1 | 0 | 5 | 0.002 |

**Table S2:** The accession number, gene name, species (Human), identification score (-10lgP), molecular weight (Mw) in kDa, protein description, total spectra per protein of EMTzeolite particles incubated with 10% human plasma, together with their relative amount (NpSpCkt value).

| Accession          | -10lgP | Mw (D)   | Description                                                    | NpSpCk   |          |          |          | Spectra  |          |          |          | Total Spectra | AverageNpSpCk |
|--------------------|--------|----------|----------------------------------------------------------------|----------|----------|----------|----------|----------|----------|----------|----------|---------------|---------------|
|                    |        |          |                                                                | Sample 1 | Sample 2 | Sample 3 | Sample 4 | Sample 1 | Sample 2 | Sample 3 | Sample 4 |               |               |
| P02675 FIBB_HUMAN  | 322.98 | 55928.21 | Fibrinogen beta chain OS=Homo sapiens GN=FGB PE=1 SV=2         | 6.663    | 5.085    | 4.621    |          | 14       | 15       | 13       |          | 42            | 4.092         |
| P02679 FIBG_HUMAN  | 268.22 | 51511.68 | Fibrinogen gamma chain OS=Homo sapiens GN=FGG PE=1 SV=3        | 7.751    | 4.417    | 3.087    |          | 15       | 12       | 8        |          | 35            | 3.814         |
| P01623 KV305_HUMAN | 145.74 | 11746.11 | Ig kappa chain V-III region WOL OS=Homo sapiens PE=1 SV=1      | 6.798    | 3.228    | 3.385    |          | 3        | 2        | 2        |          | 7             | 3.353         |
| P01620 KV302_HUMAN | 145.74 | 11775.06 | Ig kappa chain V-III region SIE OS=Homo sapiens PE=1 SV=1      | 6.782    | 3.220    | 3.377    |          | 3        | 2        | 2        |          | 7             | 3.345         |
| P02671 FIBA_HUMAN  | 388.65 | 94973.1  | Fibrinogen alpha chain OS=Homo sapiens GN=FGA PE=1 SV=2        | 7.007    | 2.795    | 3.140    |          | 25       | 14       | 15       |          | 54            | 3.235         |
| P01857 IGHG1_HUMAN | 251.46 | 36105.91 | Ig gamma-1 chain C region OS=Homo sapiens GN=IGHG1 PE=1 SV=1   | 8.109    | 3.151    | 1.652    |          | 11       | 6        | 3        |          | 20            | 3.228         |
| P02768 ALBU_HUMAN  | 220.8  | 69366.8  | Serum albumin OS=Homo sapiens GN=ALB PE=1 SV=2                 | 7.291    | 2.733    | 2.006    |          | 19       | 10       | 7        |          | 36            | 3.008         |
| P01834 IGKC_HUMAN  | 136.64 | 11608.85 | Ig kappa chain C region OS=Homo sapiens GN=IGKC PE=1 SV=1      | 0.000    | 4.900    | 6.850    |          | 0        | 3        | 4        |          | 7             | 2.937         |
| P0CG06 LAC3_HUMAN  | 131.93 | 11237.5  | Ig lambda-3 chain C regions OS=Homo sapiens GN=IGLC3 PE=1 SV=1 | 0.000    | 3.375    | 5.307    |          | 0        | 2        | 3        |          | 5             | 2.170         |
| P0CF74 LAC6_HUMAN  | 131.93 | 11276.54 | Ig lambda-6 chain C region OS=Homo sapiens GN=IGLC6 PE=4 SV=1  | 0.000    | 3.363    | 5.289    |          | 0        | 2        | 3        |          | 5             | 2.163         |
| P0CG05 LAC2_HUMAN  | 131.93 | 11293.56 | Ig lambda-2 chain C regions OS=Homo sapiens GN=IGLC2 PE=1 SV=1 | 0.000    | 3.358    | 5.281    |          | 0        | 2        | 3        |          | 5             | 2.160         |
| A0M8Q6 LAC7_HUMAN  | 131.93 | 11302.66 | Ig lambda-7 chain C region OS=Homo sapiens GN=IGLC7 PE=1 SV=2  | 0.000    | 3.355    | 5.277    |          | 0        | 2        | 3        |          | 5             | 2.158         |
| P01876 IGHA1_HUMAN | 86.65  | 37654.66 | Ig alpha-1 chain C region OS=Homo sapiens GN=IGHA1 PE=1 SV=2   | 4.948    | 1.511    | 0.528    |          | 7        | 3        | 1        |          | 11            | 1.747         |
| P01600 KV108_HUMAN | 109.71 | 11670.97 | Ig kappa chain V-I region Hau OS=Homo sapiens PE=1 SV=1        | 0.000    | 3.249    | 3.407    |          | 0        | 2        | 2        |          | 4             | 1.664         |
| P80362 KV125_HUMAN | 109.71 | 11737.07 | Ig kappa chain V-I region WAT OS=Homo sapiens PE=1 SV=1        | 0.000    | 3.231    | 3.388    |          | 0        | 2        | 2        |          | 4             | 1.655         |
| P01609 KV117_HUMAN | 109.71 | 11764.01 | Ig kappa chain V-I region Scw OS=Homo sapiens PE=1 SV=1        | 0.000    | 3.223    | 3.380    |          | 0        | 2        | 2        |          | 4             | 1.651         |
| P01608 KV116_HUMAN | 109.71 | 11782.19 | Ig kappa chain V-I region Roy OS=Homo sapiens PE=1 SV=1        | 0.000    | 3.219    | 3.375    |          | 0        | 2        | 2        |          | 4             | 1.648         |
| P01622 KV304_HUMAN | 135.63 | 11788.15 | Ig kappa chain V-III region Ti OS=Homo sapiens PE=1 SV=1       | 0.000    | 3.217    | 3.373    |          | 0        | 2        | 2        |          | 4             | 1.647         |

|                    |        |          |                                                                             |       |       |       |  |    |    |    |  |    |       |
|--------------------|--------|----------|-----------------------------------------------------------------------------|-------|-------|-------|--|----|----|----|--|----|-------|
| P01599 KV107_HUMAN | 109.71 | 11814.2  | Ig kappa chain V-I region Gal OS=Homo sapiens PE=1 SV=1                     | 0.000 | 3.210 | 3.365 |  | 0  | 2  | 2  |  | 4  | 1.644 |
| P04206 KV307_HUMAN | 135.63 | 11830.29 | Ig kappa chain V-III region GOL OS=Homo sapiens PE=1 SV=1                   | 0.000 | 3.205 | 3.361 |  | 0  | 2  | 2  |  | 4  | 1.642 |
| P01610 KV118_HUMAN | 109.71 | 11840.2  | Ig kappa chain V-I region WEA OS=Homo sapiens PE=1 SV=1                     | 0.000 | 3.203 | 3.358 |  | 0  | 2  | 2  |  | 4  | 1.640 |
| P01607 KV115_HUMAN | 109.71 | 11902.26 | Ig kappa chain V-I region Rei OS=Homo sapiens PE=1 SV=1                     | 0.000 | 3.186 | 3.341 |  | 0  | 2  | 2  |  | 4  | 1.632 |
| P01594 KV102_HUMAN | 109.71 | 11939.24 | Ig kappa chain V-I region AU OS=Homo sapiens PE=1 SV=1                      | 0.000 | 3.176 | 3.330 |  | 0  | 2  | 2  |  | 4  | 1.627 |
| P01593 KV101_HUMAN | 109.71 | 11992.34 | Ig kappa chain V-I region AG OS=Homo sapiens PE=1 SV=1                      | 0.000 | 3.162 | 3.315 |  | 0  | 2  | 2  |  | 4  | 1.619 |
| P02647 APOA1_HUMAN | 94.54  | 30777.82 | Apolipoprotein A-I OS=Homo sapiens GN=APOA1 PE=1 SV=1                       | 4.324 | 1.848 | 0.000 |  | 5  | 3  | 0  |  | 8  | 1.543 |
| P01860 IGHG3_HUMAN | 221.89 | 41286.99 | Ig gamma-3 chain C region OS=Homo sapiens GN=IGHG3 PE=1 SV=2                | 5.802 | 0.000 | 0.000 |  | 9  | 0  | 0  |  | 9  | 1.451 |
| B9A064 IGLL5_HUMAN | 121.12 | 23063.24 | Immunoglobulin lambda-like polypeptide 5 OS=Homo sapiens GN=IGLL5 PE=2 SV=2 | 5.771 | 0.000 | 0.000 |  | 5  | 0  | 0  |  | 5  | 1.443 |
| P01871 IGHM_HUMAN  | 185.79 | 49306.63 | Ig mu chain C region OS=Homo sapiens GN=IGHM PE=1 SV=3                      | 2.699 | 1.538 | 1.210 |  | 5  | 4  | 3  |  | 12 | 1.362 |
| P01024 CO3_HUMAN   | 153.36 | 187146.9 | Complement C3 OS=Homo sapiens GN=C3 PE=1 SV=2                               | 2.845 | 1.317 | 1.062 |  | 20 | 13 | 10 |  | 43 | 1.306 |
| P01766 HV305_HUMAN | 64.2   | 13226.74 | Ig heavy chain V-III region BRO OS=Homo sapiens PE=1 SV=1                   | 2.012 | 2.867 | 0.000 |  | 1  | 2  | 0  |  | 3  | 1.220 |
| P01611 KV119_HUMAN | 84.93  | 11607.91 | Ig kappa chain V-I region Wes OS=Homo sapiens PE=1 SV=1                     | 0.000 | 1.633 | 1.713 |  | 0  | 1  | 1  |  | 2  | 0.837 |
| P01598 KV106_HUMAN | 122.79 | 11788.23 | Ig kappa chain V-I region EU OS=Homo sapiens PE=1 SV=1                      | 0.000 | 1.608 | 1.686 |  | 0  | 1  | 1  |  | 2  | 0.824 |
| P04004 VTNC_HUMAN  | 63.3   | 54305.59 | Vitronectin OS=Homo sapiens GN=VTN PE=1 SV=1                                | 0.980 | 1.047 | 1.098 |  | 2  | 3  | 3  |  | 8  | 0.781 |
| P08603 CFAH_HUMAN  | 209.16 | 139096.3 | Complement factor H OS=Homo sapiens GN=CFH PE=1 SV=4                        | 1.914 | 0.409 | 0.429 |  | 10 | 3  | 3  |  | 16 | 0.688 |
| P04220 MUCB_HUMAN  | 108.03 | 43057.34 | Ig mu heavy chain disease protein OS=Homo sapiens PE=1 SV=1                 | 0.000 | 1.321 | 1.385 |  | 0  | 3  | 3  |  | 6  | 0.677 |
| P07360 CO8G_HUMAN  | 91.73  | 22277.46 | Complement component C8 gamma chain OS=Homo sapiens GN=C8G PE=1 SV=3        | 2.390 | 0.000 | 0.000 |  | 2  | 0  | 0  |  | 2  | 0.597 |
| P04003 C4BPA_HUMAN | 75.11  | 67033.3  | C4b-binding protein alpha chain OS=Homo sapiens GN=C4BPA PE=1 SV=2          | 1.191 | 0.000 | 1.186 |  | 3  | 0  | 4  |  | 7  | 0.594 |
| Q03591 FHR1_HUMAN  | 51.47  | 37650.59 | Complement factor H-related protein 1 OS=Homo sapiens GN=CFHR1 PE=1 SV=2    | 2.121 | 0.000 | 0.000 |  | 3  | 0  | 0  |  | 3  | 0.530 |
| P04433 KV309_HUMAN | 46.2   | 12575.17 | Ig kappa chain V-III region VG (Fragment) OS=Homo sapiens PE=1 SV=1         | 2.117 | 0.000 | 0.000 |  | 1  | 0  | 0  |  | 1  | 0.529 |



|                    |        |          |                                                                                                            |       |       |       |    |   |   |    |       |
|--------------------|--------|----------|------------------------------------------------------------------------------------------------------------|-------|-------|-------|----|---|---|----|-------|
| P02749 APOH_HUMAN  | 87.8   | 38298.18 | Beta-2-glycoprotein 1 OS=Homo sapiens GN=APOH PE=1 SV=3                                                    | 2.085 | 0.000 | 0.000 | 3  | 0 | 0 | 3  | 0.521 |
| P0C0L4 CO4A_HUMAN  | 139.87 | 192770.2 | Complement C4-A OS=Homo sapiens GN=C4A PE=1 SV=1                                                           | 0.967 | 0.590 | 0.516 | 7  | 6 | 5 | 18 | 0.518 |
| P0C0L5 CO4B_HUMAN  | 139.87 | 192792.2 | Complement C4-B OS=Homo sapiens GN=C4B PE=1 SV=1                                                           | 0.966 | 0.590 | 0.516 | 7  | 6 | 5 | 18 | 0.518 |
| P04208 LV106_HUMAN | 53.51  | 11724.96 | Ig lambda chain V-I region WAH OS=Homo sapiens PE=1 SV=1                                                   | 0.000 | 1.617 | 0.000 | 0  | 1 | 0 | 1  | 0.404 |
| P01700 LV102_HUMAN | 53.51  | 11896.17 | Ig lambda chain V-I region HA OS=Homo sapiens PE=1 SV=1                                                    | 0.000 | 1.594 | 0.000 | 0  | 1 | 0 | 1  | 0.398 |
| P07358 CO8B_HUMAN  | 91.8   | 67046.97 | Complement component C8 beta chain OS=Homo sapiens GN=C8B PE=1 SV=3                                        | 0.794 | 0.283 | 0.297 | 2  | 1 | 1 | 4  | 0.343 |
| P00738 HPT_HUMAN   | 71.4   | 45205.34 | Haptoglobin OS=Homo sapiens GN=HP PE=1 SV=1                                                                | 1.178 | 0.000 | 0.000 | 2  | 0 | 0 | 2  | 0.294 |
| P04114 APOB_HUMAN  | 165.78 | 515610.8 | Apolipoprotein B-100 OS=Homo sapiens GN=APOB PE=1 SV=2                                                     | 0.619 | 0.294 | 0.193 | 12 | 8 | 5 | 25 | 0.277 |
| P02747 C1QC_HUMAN  | 62.08  | 25773.65 | Complement C1q subcomponent subunit C OS=Homo sapiens GN=C1QC PE=1 SV=3                                    | 1.033 | 0.000 | 0.000 | 1  | 0 | 0 | 1  | 0.258 |
| P04196 HRG_HUMAN   | 37.95  | 59578.32 | Histidine-rich glycoprotein OS=Homo sapiens GN=HRG PE=1 SV=1                                               | 0.447 | 0.318 | 0.000 | 1  | 1 | 0 | 2  | 0.255 |
| P02751 FINC_HUMAN  | 82.53  | 262622   | Fibronectin OS=Homo sapiens GN=FN1 PE=1 SV=4                                                               | 0.709 | 0.217 | 0.076 | 7  | 3 | 1 | 11 | 0.250 |
| P00751 CFAB_HUMAN  | 135.89 | 85532.94 | Complement factor B OS=Homo sapiens GN=CFB PE=1 SV=2                                                       | 0.934 | 0.000 | 0.000 | 3  | 0 | 0 | 3  | 0.233 |
| P01042 KNG1_HUMAN  | 57.7   | 71957.42 | Kininogen-1 OS=Homo sapiens GN=KNG1 PE=1 SV=2                                                              | 0.740 | 0.000 | 0.000 | 2  | 0 | 0 | 2  | 0.185 |
| P35858 ALS_HUMAN   | 55.07  | 66035.11 | Insulin-like growth factor-binding protein complex acid labile subunit OS=Homo sapiens GN=IGFALS PE=1 SV=1 | 0.000 | 0.287 | 0.301 | 0  | 1 | 1 | 2  | 0.147 |
| P01877 IGHA2_HUMAN | 53     | 36526.34 | Ig alpha-2 chain C region OS=Homo sapiens GN=IGHA2 PE=1 SV=3                                               | 0.000 | 0.000 | 0.544 | 0  | 0 | 1 | 1  | 0.136 |
| P00739 HPTR_HUMAN  | 31.28  | 39029.59 | Haptoglobin-related protein OS=Homo sapiens GN=HPR PE=1 SV=2                                               | 0.000 | 0.000 | 0.509 | 0  | 0 | 1 | 1  | 0.127 |
| P10909 CLUS_HUMAN  | 37.99  | 52494.64 | Clusterin OS=Homo sapiens GN=CLU PE=1 SV=1                                                                 | 0.000 | 0.361 | 0.000 | 0  | 1 | 0 | 1  | 0.120 |
| P06396 GELS_HUMAN  | 34.64  | 85697.48 | Gelsolin OS=Homo sapiens GN=GSN PE=1 SV=1                                                                  | 0.000 | 0.221 | 0.000 | 0  | 1 | 0 | 1  | 0.074 |
| P03952 KLKB1_HUMAN | 56.5   | 71369.8  | Plasma kallikrein OS=Homo sapiens GN=KLKB1 PE=1 SV=1                                                       | 0.000 | 0.000 | 0.279 | 0  | 0 | 1 | 1  | 0.070 |
| P00747 PLMN_HUMAN  | 66.81  | 90569.05 | Plasminogen OS=Homo sapiens GN=PLG PE=1 SV=2                                                               | 0.000 | 0.209 | 0.000 | 0  | 1 | 0 | 1  | 0.052 |
| P26006 ITA3_HUMAN  | 29.19  | 116612.1 | Integrin alpha-3 OS=Homo sapiens GN=ITGA3 PE=1 SV=5                                                        | 0.000 | 0.000 | 0.170 | 0  | 0 | 1 | 1  | 0.043 |
| P01777 HV316_HUMAN | 64.2   | 2012559  | Ig heavy chain V-III region TEI OS=Homo sapiens PE=1 SV=1                                                  | 0.013 | 0.019 | 0.000 | 1  | 2 | 0 | 3  | 0.008 |

|                    |        |         |                                                              |       |       |       |  |   |   |   |  |   |       |
|--------------------|--------|---------|--------------------------------------------------------------|-------|-------|-------|--|---|---|---|--|---|-------|
| P01779 HV318_HUMAN | 67.52  | 2012188 | Ig heavy chain V-III region TUR<br>OS=Homo sapiens PE=1 SV=1 | 0.000 | 0.009 | 0.010 |  | 0 | 1 | 1 |  | 2 | 0.005 |
| P01774 HV313_HUMAN | 67.52  | 2012710 | Ig heavy chain V-III region POM<br>OS=Homo sapiens PE=1 SV=1 | 0.000 | 0.009 | 0.010 |  | 0 | 1 | 1 |  | 2 | 0.005 |
| P01776 HV315_HUMAN | 67.52  | 2012847 | Ig heavy chain V-III region WAS<br>OS=Homo sapiens PE=1 SV=1 | 0.000 | 0.009 | 0.010 |  | 0 | 1 | 1 |  | 2 | 0.005 |
| P01596 KV104_HUMAN | 122.79 | 3011346 | Ig kappa chain V-I region CAR<br>OS=Homo sapiens PE=1 SV=1   | 0.000 | 0.006 | 0.007 |  | 0 | 1 | 1 |  | 2 | 0.003 |
| P01765 HV304_HUMAN | 67.52  | 6011611 | Ig heavy chain V-III region TIL<br>OS=Homo sapiens PE=1 SV=1 | 0.000 | 0.003 | 0.003 |  | 0 | 1 | 1 |  | 2 | 0.002 |

**Table S3:** The accession number, gene name, species (Human), identification score (-10lgP), molecular weight (Mw) in kDa, protein description, total spectra per protein of LTL zeolite particles incubated with 100% human plasma, together with their relative amount (NpSpCkt value).

| Accession          | -10lgP | Mw (D)   | Description                                                                                    | Sample 1 | Sample 2 | Sample 3 | Sample 4 | Sample 1 | Sample 2 | Sample 3 | Sample 4 | Total Spectra | Average NpSpCkt |
|--------------------|--------|----------|------------------------------------------------------------------------------------------------|----------|----------|----------|----------|----------|----------|----------|----------|---------------|-----------------|
| P02675 FIBB_HUMAN  | 260.4  | 55928.21 | Fibrinogen beta chain OS=Homo sapiens GN=FGB PE=1 SV=2                                         | 22.357   | 30.243   | 27.477   | 26.909   | 15       | 16       | 14       | 16       | 61            | 26.747          |
| P02679 FIBG_HUMAN  | 235.05 | 51511.68 | Fibrinogen gamma chain OS=Homo sapiens GN=FGG PE=1 SV=3                                        | 24.274   | 24.627   | 25.571   | 20.086   | 15       | 12       | 12       | 11       | 50            | 23.640          |
| P02671 FIBA_HUMAN  | 257.06 | 94973.1  | Fibrinogen alpha chain OS=Homo sapiens GN=FGA PE=1 SV=2                                        | 17.554   | 14.470   | 13.869   | 13.865   | 20       | 13       | 12       | 14       | 59            | 14.940          |
| P02649 APOE_HUMAN  | 169.53 | 36154.09 | Apolipoprotein E OS=Homo sapiens GN=APOE PE=1 SV=1                                             | 6.917    | 5.848    | 6.072    | 5.203    | 3        | 2        | 2        | 2        | 9             | 6.010           |
| P06396 GELS_HUMAN  | 195.87 | 85697.48 | Gelsolin OS=Homo sapiens GN=GSN PE=1 SV=1                                                      | 5.836    | 4.934    | 5.124    | 3.293    | 6        | 4        | 4        | 3        | 17            | 4.797           |
| P02652 APOA2_HUMAN | 37.79  | 11175.02 | Apolipoprotein A-II OS=Homo sapiens GN=APOA2 PE=1 SV=1                                         | 0.000    | 0.000    | 9.823    | 8.417    | 0        | 0        | 1        | 1        | 2             | 4.560           |
| P01024 CO3_HUMAN   | 177.03 | 187146.9 | Complement C3 OS=Homo sapiens GN=C3 PE=1 SV=2                                                  | 2.227    | 4.519    | 6.452    | 5.026    | 5        | 8        | 11       | 10       | 34            | 4.556           |
| P02768 ALBU_HUMAN  | 147.94 | 69366.8  | Serum albumin OS=Homo sapiens GN=ALB PE=1 SV=2                                                 | 4.807    | 4.572    | 3.165    | 4.068    | 4        | 3        | 2        | 3        | 12            | 4.153           |
| P04004 VTNC_HUMAN  | 133.51 | 54305.59 | Vitronectin OS=Homo sapiens GN=VTN PE=1 SV=1                                                   | 6.140    | 1.947    | 2.021    | 1.732    | 4        | 1        | 1        | 1        | 7             | 2.960           |
| P35542 SAA4_HUMAN  | 35.46  | 14746.64 | Serum amyloid A-4 protein OS=Homo sapiens GN=SAA4 PE=1 SV=2                                    | 5.653    | 0.000    | 0.000    | 0.000    | 1        | 0        | 0        | 0        | 1             | 1.413           |
| P01861 IGHG4_HUMAN | 66.97  | 35940.57 | Ig gamma-4 chain C region OS=Homo sapiens GN=IGHG4 PE=1 SV=1                                   | 0.000    | 2.941    | 0.000    | 2.617    | 0        | 1        | 0        | 1        | 2             | 1.390           |
| P01857 IGHG1_HUMAN | 66.97  | 36105.91 | Ig gamma-1 chain C region OS=Homo sapiens GN=IGHG1 PE=1 SV=1                                   | 0.000    | 2.928    | 0.000    | 2.605    | 0        | 1        | 0        | 1        | 2             | 1.383           |
| P01860 IGHG3_HUMAN | 66.97  | 41286.99 | Ig gamma-3 chain C region OS=Homo sapiens GN=IGHG3 PE=1 SV=2                                   | 0.000    | 2.560    | 0.000    | 2.278    | 0        | 1        | 0        | 1        | 2             | 1.210           |
| Q96PM5 ZN363_HUMAN | 25.91  | 30110.39 | RING finger and CHY zinc finger domain-containing protein 1 OS=Homo sapiens GN=RCHY1 PE=1 SV=1 | 0.000    | 0.000    | 0.000    | 3.124    | 0        | 0        | 0        | 1        | 1             | 0.781           |
| P04220 MUCB_HUMAN  | 86.08  | 43057.34 | Ig mu heavy chain disease protein OS=Homo sapiens PE=1 SV=1                                    | 1.936    | 0.000    | 0.000    | 0.000    | 1        | 0        | 0        | 0        | 1             | 0.484           |
| P01871 IGHM_HUMAN  | 86.08  | 49306.63 | Ig mu chain C region OS=Homo sapiens GN=IGHM PE=1 SV=3                                         | 1.691    | 0.000    | 0.000    | 0.000    | 1        | 0        | 0        | 0        | 1             | 0.423           |
| P04114 APOB_HUMAN  | 80.01  | 515610.8 | Apolipoprotein B-100 OS=Homo sapiens GN=APOB PE=1 SV=2                                         | 0.000    | 0.410    | 0.426    | 0.547    | 0        | 2        | 2        | 3        | 7             | 0.346           |
| P08603 CFAH_HUMAN  | 35.22  | 139096.3 | Complement factor H OS=Homo sapiens GN=CFH PE=1 SV=4                                           | 0.599    | 0.000    | 0.000    | 0.000    | 1        | 0        | 0        | 0        | 1             | 0.150           |
| Q96Q15 SMG1_HUMAN  | 26.86  | 410501.4 | Serine/threonine-protein kinase SMG1                                                           | 0.000    | 0.000    | 0.000    | 0.229    | 0        | 0        | 0        | 1        | 1             | 0.057           |

|                    |      |          |                                                       |       |       |       |       |   |   |   |   |   |       |
|--------------------|------|----------|-------------------------------------------------------|-------|-------|-------|-------|---|---|---|---|---|-------|
|                    |      |          | OS=Homo sapiens GN=SMG1 PE=1<br>SV=3                  |       |       |       |       |   |   |   |   |   |       |
| P49908 SEPP1_HUMAN | 65.8 | 10041670 | Selenoprotein P OS=Homo sapiens<br>GN=SEPP1 PE=1 SV=3 | 0.008 | 0.000 | 0.000 | 0.000 | 1 | 0 | 0 | 0 | 1 | 0.002 |

**Table S4:** The accession number, gene name, species (Human), identification score (-10lgP), molecular weight (Mw) in kDa., protein description, total spectra per protein of EMTzeolite particles incubated with 100% human plasma, together with their relative amount (NpSpCkt value).

| Accession          | -10lgP | Mw (D)   | Description                                                            | NpSpCk   |          |          |          | Spectra  |          |          |          | Total Spectra | AverageNpSpCk |
|--------------------|--------|----------|------------------------------------------------------------------------|----------|----------|----------|----------|----------|----------|----------|----------|---------------|---------------|
|                    |        |          |                                                                        | Sample 1 | Sample 2 | Sample 3 | Sample 4 | Sample 1 | Sample 2 | Sample 3 | Sample 4 |               |               |
| P02671 FIBA_HUMAN  | 219.4  | 94973.1  | Fibrinogen alpha chain<br>OS=Homo sapiens<br>GN=FGA PE=1 SV=2          | 40.541   | 37.217   | 21.430   | 22.545   | 7        | 9        | 9        | 8        | 33            | 30.43         |
| P02679 FIBG_HUMAN  | 129.51 | 51511.68 | Fibrinogen gamma chain<br>OS=Homo sapiens<br>GN=FGG PE=1 SV=3          | 42.712   | 30.497   | 8.780    | 10.392   | 4        | 4        | 2        | 2        | 12            | 23.10         |
| P02675 FIBB_HUMAN  | 116.5  | 55928.21 | Fibrinogen beta chain<br>OS=Homo sapiens<br>GN=FGB PE=1 SV=2           | 0.000    | 28.089   | 16.174   | 19.142   | 0        | 4        | 4        | 4        | 12            | 15.85         |
| P02652 APOA2_HUMAN | 27.25  | 11175.02 | Apolipoprotein A-II<br>OS=Homo sapiens<br>GN=APOA2 PE=1 SV=1           | 0.000    | 0.000    | 20.236   | 23.950   | 0        | 0        | 1        | 1        | 2             | 11.05         |
| P02647 APOA1_HUMAN | 60.62  | 30777.82 | Apolipoprotein A-I<br>OS=Homo sapiens<br>GN=APOA1 PE=1 SV=1            | 0.000    | 0.000    | 22.043   | 17.392   | 0        | 0        | 3        | 2        | 5             | 9.86          |
| P01024 CO3_HUMAN   | 100.8  | 187146.9 | Complement C3 OS=Homo sapiens<br>GN=C3 PE=1 SV=2                       | 8.817    | 4.197    | 2.417    | 2.860    | 3        | 2        | 2        | 2        | 9             | 4.57          |
| P02768 ALBU_HUMAN  | 106.44 | 69366.8  | Serum albumin OS=Homo sapiens<br>GN=ALB PE=1 SV=2                      | 7.929    | 0.000    | 0.000    | 0.000    | 1        | 0        | 0        | 0        | 1             | 1.98          |
| P06727 APOA4_HUMAN | 27.05  | 45399.07 | Apolipoprotein A-IV<br>OS=Homo sapiens<br>GN=APOA4 PE=1 SV=3           | 0.000    | 0.000    | 4.981    | 0.000    | 0        | 0        | 1        | 0        | 1             | 1.25          |
| Q06203 PUR1_HUMAN  | 29.92  | 57399.04 | Amidophosphoribosyltransferase<br>OS=Homo sapiens<br>GN=PPAT PE=1 SV=1 | 0.000    | 0.000    | 3.940    | 0.000    | 0        | 0        | 1        | 0        | 1             | 0.98          |
| P01042 KNG1_HUMAN  | 34.77  | 71957.42 | Kininogen-1 OS=Homo sapiens<br>GN=KNG1 PE=1 SV=2                       | 0.000    | 0.000    | 0.000    | 3.719    | 0        | 0        | 0        | 1        | 1             | 0.93          |

**Table S5:** The shared identified proteins in the LTL-10 and EMT-10 samples. The accession number, gene name, species (Human), identification score (-10lgP), molecular weight (Mw) in kDa, protein description, total spectra per protein of LTL and EMT zeolite particles incubated with 10% human plasma, and the relative amount (NpSpCk value) are shown; the average of four measurements is used.

| Accession          | -10lgP | Mw (D)   | Description                                                                 | Total Spectra (13-10%) | Average NpSpCk (13-10%) | Total Spectra (14-10%) | Average NpSpCk (14-10%) |
|--------------------|--------|----------|-----------------------------------------------------------------------------|------------------------|-------------------------|------------------------|-------------------------|
| P02675 FIBB_HUMAN  | 249.19 | 55928.21 | Fibrinogen beta chain OS=Homo sapiens GN=FGB PE=1 SV=2                      | 45                     | 2.89                    | 42                     | 4.092292097             |
| P02679 FIBG_HUMAN  | 299.49 | 51511.68 | Fibrinogen gamma chain OS=Homo sapiens GN=FGG PE=1 SV=3                     | 61                     | 4.78                    | 35                     | 3.813866733             |
| P01623 KV305_HUMAN | 177.59 | 11746.11 | Ig kappa chain V-III region WOL OS=Homo sapiens PE=1 SV=1                   | 10                     | 2.67                    | 7                      | 3.352913064             |
| P01620 KV302_HUMAN | 177.59 | 11775.06 | Ig kappa chain V-III region SIE OS=Homo sapiens PE=1 SV=1                   | 10                     | 2.66                    | 7                      | 3.344669326             |
| P02671 FIBA_HUMAN  | 387.69 | 94973.1  | Fibrinogen alpha chain OS=Homo sapiens GN=FGA PE=1 SV=2                     | 117                    | 4.46                    | 54                     | 3.235376435             |
| P01857 IGHG1_HUMAN | 239.11 | 36105.91 | Ig gamma-1 chain C region OS=Homo sapiens GN=IGHG1 PE=1 SV=1                | 38                     | 3.86                    | 20                     | 3.228004248             |
| P02768 ALBU_HUMAN  | 283.01 | 69366.8  | Serum albumin OS=Homo sapiens GN=ALB PE=1 SV=2                              | 72                     | 3.83                    | 36                     | 3.007582442             |
| P01834 IGKC_HUMAN  | 196.84 | 11608.85 | Ig kappa chain C region OS=Homo sapiens GN=IGKC PE=1 SV=1                   | 20                     | 7.53                    | 7                      | 2.937444782             |
| P0CG06 LAC3_HUMAN  | 149.33 | 11237.5  | Ig lambda-3 chain C regions OS=Homo sapiens GN=IGLC3 PE=1 SV=1              | 3                      | 1.24                    | 5                      | 2.170432825             |
| P0CF74 LAC6_HUMAN  | 124.95 | 11276.54 | Ig lambda-6 chain C region OS=Homo sapiens GN=IGLC6 PE=4 SV=1               | 1                      | 0.72                    | 5                      | 2.162918666             |
| P0CG05 LAC2_HUMAN  | 149.33 | 11293.56 | Ig lambda-2 chain C regions OS=Homo sapiens GN=IGLC2 PE=1 SV=1              | 11                     | 3.55                    | 5                      | 2.159657807             |
| A0M8Q6 LAC7_HUMAN  | 124.95 | 11302.66 | Ig lambda-7 chain C region OS=Homo sapiens GN=IGLC7 PE=1 SV=2               | 3                      | 1.30                    | 5                      | 2.157918908             |
| P01876 IGHA1_HUMAN | 148.03 | 37654.66 | Ig alpha-1 chain C region OS=Homo sapiens GN=IGHA1 PE=1 SV=2                | 14                     | 1.17                    | 11                     | 1.746709228             |
| P01600 KV108_HUMAN | 119.06 | 11670.97 | Ig kappa chain V-I region Hau OS=Homo sapiens PE=1 SV=1                     | 4                      | 1.50                    | 4                      | 1.663978686             |
| P80362 KV125_HUMAN | 119.06 | 11737.07 | Ig kappa chain V-I region WAT OS=Homo sapiens PE=1 SV=1                     | 4                      | 1.50                    | 4                      | 1.654607239             |
| P01609 KV117_HUMAN | 119.06 | 11764.01 | Ig kappa chain V-I region Scw OS=Homo sapiens PE=1 SV=1                     | 4                      | 1.49                    | 4                      | 1.650817933             |
| P01608 KV116_HUMAN | 119.06 | 11782.19 | Ig kappa chain V-I region Roy OS=Homo sapiens PE=1 SV=1                     | 4                      | 1.49                    | 4                      | 1.648270206             |
| P01599 KV107_HUMAN | 119.06 | 11814.2  | Ig kappa chain V-I region Gal OS=Homo sapiens PE=1 SV=1                     | 4                      | 1.49                    | 4                      | 1.643804202             |
| P01610 KV118_HUMAN | 119.06 | 11840.2  | Ig kappa chain V-I region WEA OS=Homo sapiens PE=1 SV=1                     | 4                      | 1.48                    | 4                      | 1.640195501             |
| P01607 KV115_HUMAN | 119.06 | 11902.26 | Ig kappa chain V-I region Rei OS=Homo sapiens PE=1 SV=1                     | 4                      | 1.47                    | 4                      | 1.631643228             |
| P01594 KV102_HUMAN | 119.06 | 11939.24 | Ig kappa chain V-I region AU OS=Homo sapiens PE=1 SV=1                      | 4                      | 1.47                    | 4                      | 1.626589785             |
| P01593 KV101_HUMAN | 119.06 | 11992.34 | Ig kappa chain V-I region AG OS=Homo sapiens PE=1 SV=1                      | 4                      | 1.46                    | 4                      | 1.61938639              |
| P02647 APOA1_HUMAN | 237.89 | 30777.82 | Apolipoprotein A-I OS=Homo sapiens GN=APOA1 PE=1 SV=1                       | 40                     | 4.26                    | 8                      | 1.543084783             |
| P01860 IGHG3_HUMAN | 162.25 | 41286.99 | Ig gamma-3 chain C region OS=Homo sapiens GN=IGHG3 PE=1 SV=2                | 21                     | 1.61                    | 9                      | 1.450586455             |
| B9A064 IGLL5_HUMAN | 128.78 | 23063.24 | Immunoglobulin lambda-like polypeptide 5 OS=Homo sapiens GN=IGLL5 PE=2 SV=2 | 8                      | 1.31                    | 5                      | 1.44265989              |

|                    |        |          |                                                                                                            |     |      |    |             |
|--------------------|--------|----------|------------------------------------------------------------------------------------------------------------|-----|------|----|-------------|
| P01871 IGHM_HUMAN  | 171.05 | 49306.63 | Ig mu chain C region OS=Homo sapiens GN=IGHM PE=1 SV=3                                                     | 25  | 2.00 | 12 | 1.361741678 |
| P01024 CO3_HUMAN   | 407.55 | 187146.9 | Complement C3 OS=Homo sapiens GN=C3 PE=1 SV=2                                                              | 115 | 2.35 | 43 | 1.305985701 |
| P01766 HV305_HUMAN | 85.54  | 13226.74 | Ig heavy chain V-III region BRO OS=Homo sapiens PE=1 SV=1                                                  | 4   | 1.33 | 3  | 1.219856809 |
| P01611 KV119_HUMAN | 74.55  | 11607.91 | Ig kappa chain V-I region Wes OS=Homo sapiens PE=1 SV=1                                                    | 1   | 0.70 | 2  | 0.836508531 |
| P01598 KV106_HUMAN | 71.45  | 11788.23 | Ig kappa chain V-I region EU OS=Homo sapiens PE=1 SV=1                                                     | 7   | 2.29 | 2  | 0.823712836 |
| P04004 VTNC_HUMAN  | 182.35 | 54305.59 | Vitronectin OS=Homo sapiens GN=VTN PE=1 SV=1                                                               | 15  | 0.96 | 8  | 0.781490825 |
| P08603 CFAH_HUMAN  | 188.42 | 139096.3 | Complement factor H OS=Homo sapiens GN=CFH PE=1 SV=4                                                       | 23  | 0.52 | 16 | 0.687834096 |
| P04003 C4BPA_HUMAN | 130.15 | 67033.3  | C4b-binding protein alpha chain OS=Homo sapiens GN=C4BPA PE=1 SV=2                                         | 14  | 0.66 | 7  | 0.594382605 |
| P04433 KV309_HUMAN | 39.58  | 12575.17 | Ig kappa chain V-III region VG (Fragment) OS=Homo sapiens PE=1 SV=1                                        | 2   | 0.49 | 1  | 0.529176254 |
| P02749 APOH_HUMAN  | 66.52  | 38298.18 | Beta-2-glycoprotein 1 OS=Homo sapiens GN=APOH PE=1 SV=3                                                    | 3   | 0.25 | 3  | 0.52126359  |
| POC0L4 CO4A_HUMAN  | 207.03 | 192770.2 | Complement C4-A OS=Homo sapiens GN=C4A PE=1 SV=1                                                           | 29  | 0.47 | 18 | 0.518088976 |
| POC0L5 CO4B_HUMAN  | 207.03 | 192792.2 | Complement C4-B OS=Homo sapiens GN=C4B PE=1 SV=1                                                           | 32  | 0.60 | 18 | 0.518029772 |
| P04208 LV106_HUMAN | 105.35 | 11724.96 | Ig lambda chain V-I region WAH OS=Homo sapiens PE=1 SV=1                                                   | 8   | 2.14 | 1  | 0.404276496 |
| P01700 LV102_HUMAN | 85.38  | 11896.17 | Ig lambda chain V-I region HA OS=Homo sapiens PE=1 SV=1                                                    | 5   | 1.32 | 1  | 0.398458136 |
| P00738 HPT_HUMAN   | 35.67  | 45205.34 | Haptoglobin OS=Homo sapiens GN=HP PE=1 SV=1                                                                | 1   | 0.07 | 2  | 0.294411365 |
| P04114 APOB_HUMAN  | 270.42 | 515610.8 | Apolipoprotein B-100 OS=Homo sapiens GN=APOB PE=1 SV=2                                                     | 47  | 0.35 | 25 | 0.27661325  |
| P04196 HRG_HUMAN   | 48.64  | 59578.32 | Histidine-rich glycoprotein OS=Homo sapiens GN=HRG PE=1 SV=1                                               | 5   | 0.26 | 2  | 0.255       |
| P02751 FINC_HUMAN  | 121.41 | 262622   | Fibronectin OS=Homo sapiens GN=FN1 PE=1 SV=4                                                               | 15  | 0.20 | 11 | 0.250442649 |
| P00751 CFAB_HUMAN  | 198.24 | 85532.94 | Complement factor B OS=Homo sapiens GN=CFB PE=1 SV=2                                                       | 23  | 0.91 | 3  | 0.233400714 |
| P01042 KNG1_HUMAN  | 41.23  | 71957.42 | Kininogen-1 OS=Homo sapiens GN=KNG1 PE=1 SV=2                                                              | 3   | 0.20 | 2  | 0.184956123 |
| P35858 ALS_HUMAN   | 52.14  | 66035.11 | Insulin-like growth factor-binding protein complex acid labile subunit OS=Homo sapiens GN=IGFALS PE=1 SV=1 | 3   | 0.14 | 2  | 0.147044796 |
| P00739 HPTR_HUMAN  | 43.51  | 39029.59 | Haptoglobin-related protein OS=Homo sapiens GN=HPR PE=1 SV=2                                               | 1   | 0.08 | 1  | 0.127339149 |
| P10909 CLUS_HUMAN  | 78.74  | 52494.64 | Clusterin OS=Homo sapiens GN=CLU PE=1 SV=1                                                                 | 4   | 0.34 | 1  | 0.120       |
| P06396 GELS_HUMAN  | 118.08 | 85697.48 | Gelsolin OS=Homo sapiens GN=GSN PE=1 SV=1                                                                  | 16  | 0.76 | 1  | 0.074       |
| P00747 PLMN_HUMAN  | 77.59  | 90569.05 | Plasminogen OS=Homo sapiens GN=PLG PE=1 SV=2                                                               | 13  | 0.51 | 1  | 0.052337136 |
| P01777 HV316_HUMAN | 85.54  | 2012559  | Ig heavy chain V-III region TEI OS=Homo sapiens PE=1 SV=1                                                  | 4   | 0.01 | 3  | 0.008017022 |
| P01779 HV318_HUMAN | 91.64  | 2012188  | Ig heavy chain V-III region TUR OS=Homo sapiens PE=1 SV=1                                                  | 4   | 0.01 | 2  | 0.004825652 |
| P01774 HV313_HUMAN | 91.64  | 2012710  | Ig heavy chain V-III region POM OS=Homo sapiens PE=1 SV=1                                                  | 5   | 0.01 | 2  | 0.004824401 |
| P01776 HV315_HUMAN | 91.64  | 2012847  | Ig heavy chain V-III region WAS OS=Homo sapiens PE=1 SV=1                                                  | 4   | 0.01 | 2  | 0.004824072 |
| P01596 KV104_HUMAN | 107.19 | 3011346  | Ig kappa chain V-I region CAR OS=Homo sapiens PE=1 SV=1                                                    | 1   | 0.00 | 2  | 0.003224511 |
| P01765 HV304_HUMAN | 91.64  | 6011611  | Ig heavy chain V-III region TIL OS=Homo sapiens PE=1 SV=1                                                  | 4   | 0.00 | 2  | 0.001615227 |
